# Supplementary material for: Soil Salinity Mapping and Hydrological Drought Indices Assessment in Arid Environments Based on Remote Sensing Techniques
Source: Copernicus journal article supplement (doi:10.5194/gi-2016-39), 2016-12-08
Supplement: Supplementary file [file gi-2016-39-RC1-supplement.pdf]

## Review-gi-2016-39

Dear Author,

I found some mistakes related to references which are used in the paper. They are below:

1. In the text it was written **Leprieur et al. 1994** (page 3, line 2) but in the references section (page 16, line 4) the year of this paper was written as **2000**. Please check it.
2. In the text it was written **Pinty and Verstraete, 1991** but in the references section (page 16, line 19) the year of this paper was written as Pinty, B. **abd** Verstraete, M.M. **(1992)**. Please check it.
3. In the “2.3.2. Soil Adjusted Vegetation Index (SAVI)” section **Huete, 1988** was used as a references. But it wasn’t written in the references section. Please check it.
4. In the “Results and Discussion” section (lines 11 and 12) it was written **Hunt et. al, 1989** but in the references section **Hunt and Rock, 1989**. Please check it.
5. The reference **Lunetta et al., 2002** was used in the “Results and Discussion” section but it wasn’t in the references section. Please check it.
6. The reference **Shishi et al., 2015** was used in the “Results and Discussion” section but it wasn’t in the references section. Please check it.
7. **Jiaper et al., 2011 and Konukcu et al., 2006** were wtitten two times in the references section. Please delete them. Please check it.
8. In the conclusion section (first line) it was written **horological** instead of hidrological. Please fix it.
